# Supplementary material for: Direct and indirect pathways for heterosynaptic interaction underlying developmental synapse elimination in the mouse cerebellum
Source: PubMed Central journal article supplement (PMC11222442; doi:10.1038/s42003-024-06447-4), 2024-07-03
Supplement: 42003_2024_6447_MOESM2_ESM.pdf [file 42003_2024_6447_MOESM2_ESM.pdf]

## **Supplementary Figures**

### **Direct and indirect pathways for heterosynaptic interaction underlying developmental synapse elimination in cerebellar Purkinje cells**

Hisako Nakayama, Taisuke Miyazaki, Manabu Abe, Maya Yamazaki, Yoshinobu Kawamura, Myeongjeong Choo, Kohtarou Konno, Shinya Kawata, Naofumi Uesaka, Kouichi Hashimoto, Mariko Miyata, Kenji Sakimura, Masahiko Watanabe & Masanobu Kano

# Supplementary Figure 1

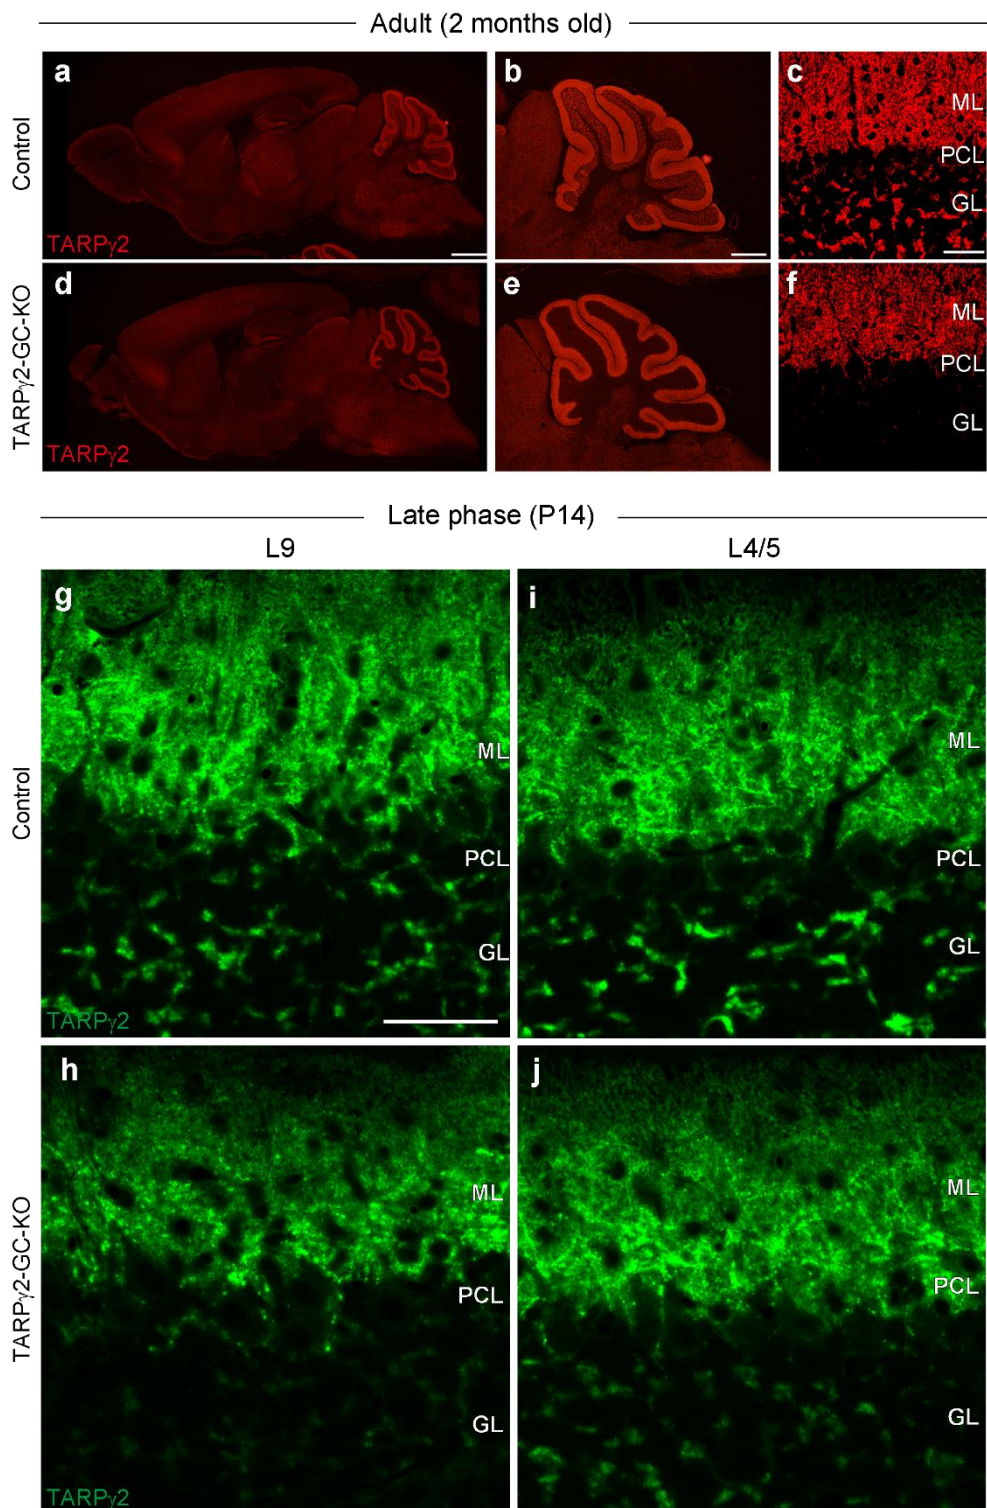

**Supplementary Figure 1. Deficient TARPy2 expression in GCs in lobules 8-9 but not in lobules 1-4/5 of TARPy2-GC KO mice during the third postnatal week**

**a-f** Immunostaining for TARPy2 in a mature control (**a-c**) and a mature TARPy2-GC-KO (**d-f**) mouse at 2 months of age showing the TARPy2 expression in the whole brain (**a, d**), the whole cerebellum (**b, e**), and the three cerebellar cortical layers (**c, f**). ML: molecular layer, PCL: Purkinje cell layer, GL: granule cell layer. Scale bar: 1000  $\mu\text{m}$  for **a**, 200  $\mu\text{m}$  for **b**, and 50  $\mu\text{m}$  for **c**.

**g-j** Immunostaining for TARPy2 in lobule 9 (**g, h**) and lobule 4/5 (**i, j**) of the cerebellum from a control (**g, i**) and a TARPy2-GC-KO (**h, j**) mice at P14. Scale bar, 50  $\mu\text{m}$

## Supplementary Figure 2

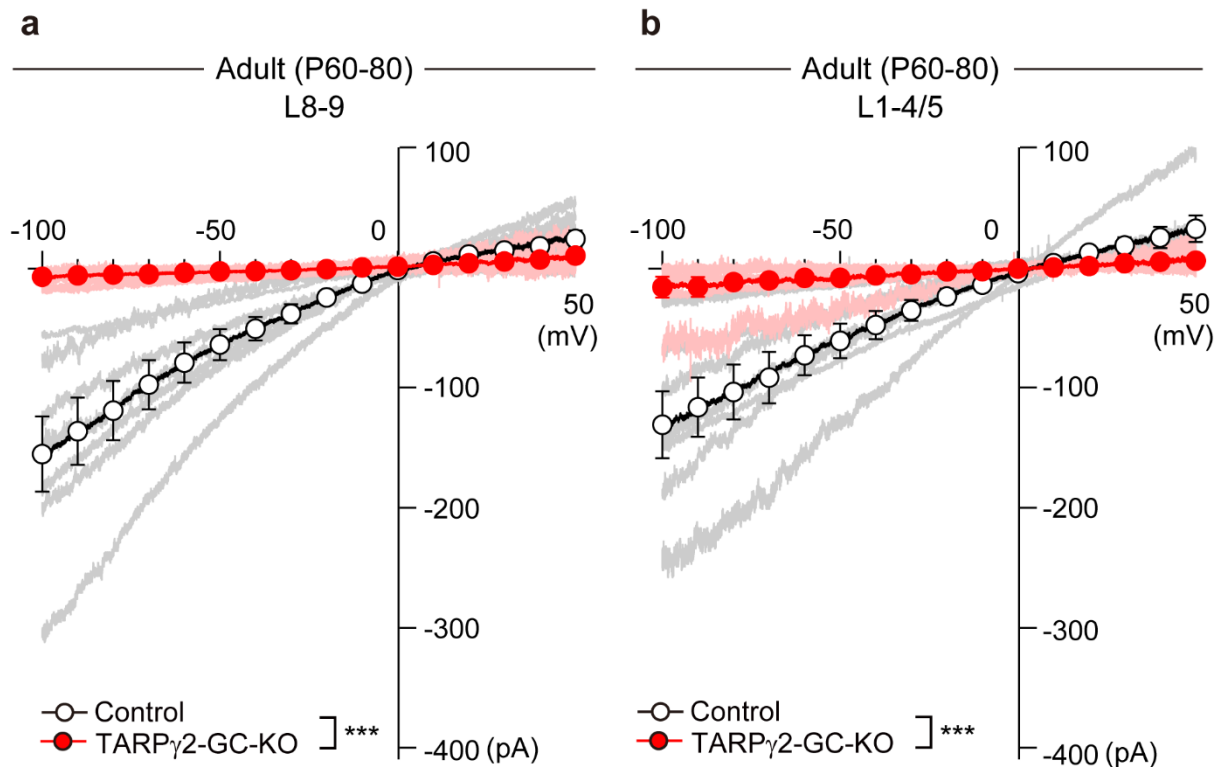

### Supplementary Figure 2. Deficient AMPAR-mediated currents in GCs in both lobules 8-9 and lobules 1-4/5 of mature TARP $\gamma$ 2-GC-KO mice

**a, b** Instantaneous I-V relationships of the AMPA (10  $\mu$ M)-induced current evoked in GCs of lobules 8-9 (**a**) and lobules 1-4/5 (**b**) of the cerebellum from control (white symbols with bold black line,  $n = 7$  for **a** and **b**) and TARP $\gamma$ 2-GC-KO (red symbols with red bold line,  $n = 8$  for **a** and **b**) mice from P60 to P80. Data from individual cells are shown in faint lines.  $P < 0.001$  for **a** and **b**, Two-way Repeated-Measures ANOVA. Data are mean  $\pm$  SEM.

### Supplementary Figure 3

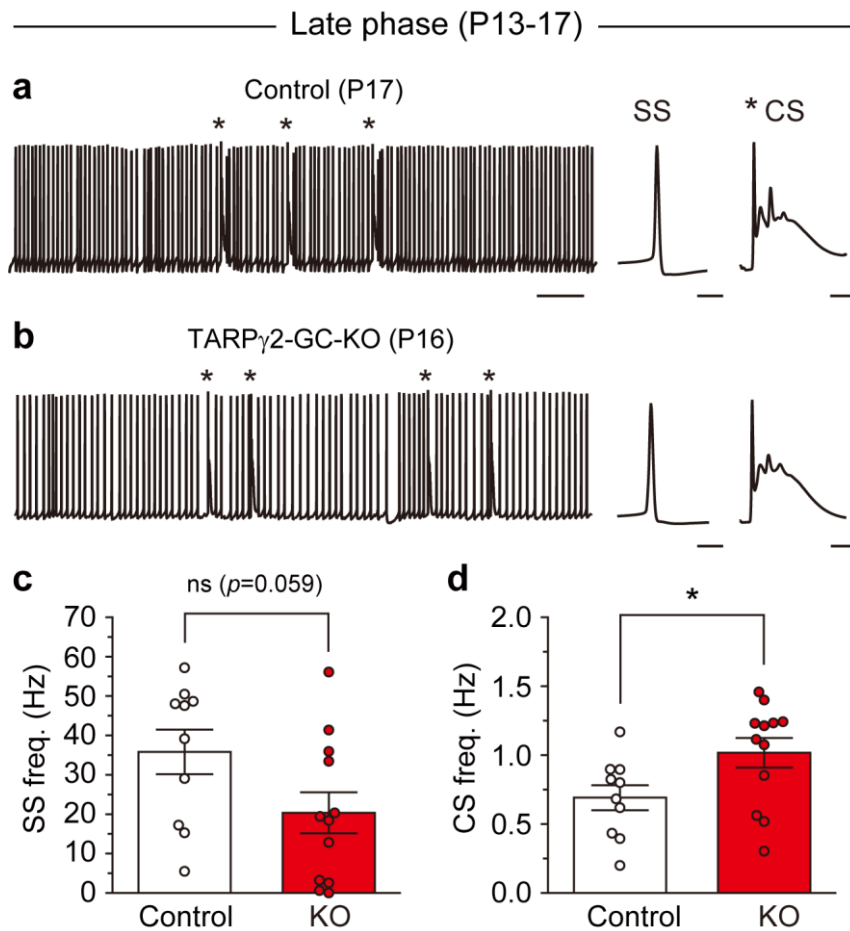

### Supplementary Figure 3. Spontaneous firing and synaptic potentials in PCs recorded from control and TARP $\gamma$ 2-GC-KO mice *in vivo*

**a, b** Sample traces of membrane potentials in PCs from a P17 control (**a**) and a P16 TARP $\gamma$ 2-GC-KO (**b**) mouse. SS: simple spike, CS: complex spike. The resting membrane potential was -43 mV for **a** and -44 mV for **b**. Horizontal scale bars, 0.5 s (left traces), 1 ms (SS), and 5 ms (CS). Vertical scale bar, 20 mV.

**c, d** Summary bar graphs showing the average frequency of simple spikes (**c**) and complex spikes (**d**) in control and TARP $\gamma$ 2-GC-KO mice at P13-P17.  $P < 0.05$ , *t*-test. Data are mean  $\pm$  SEM.

## Supplementary Figure 4

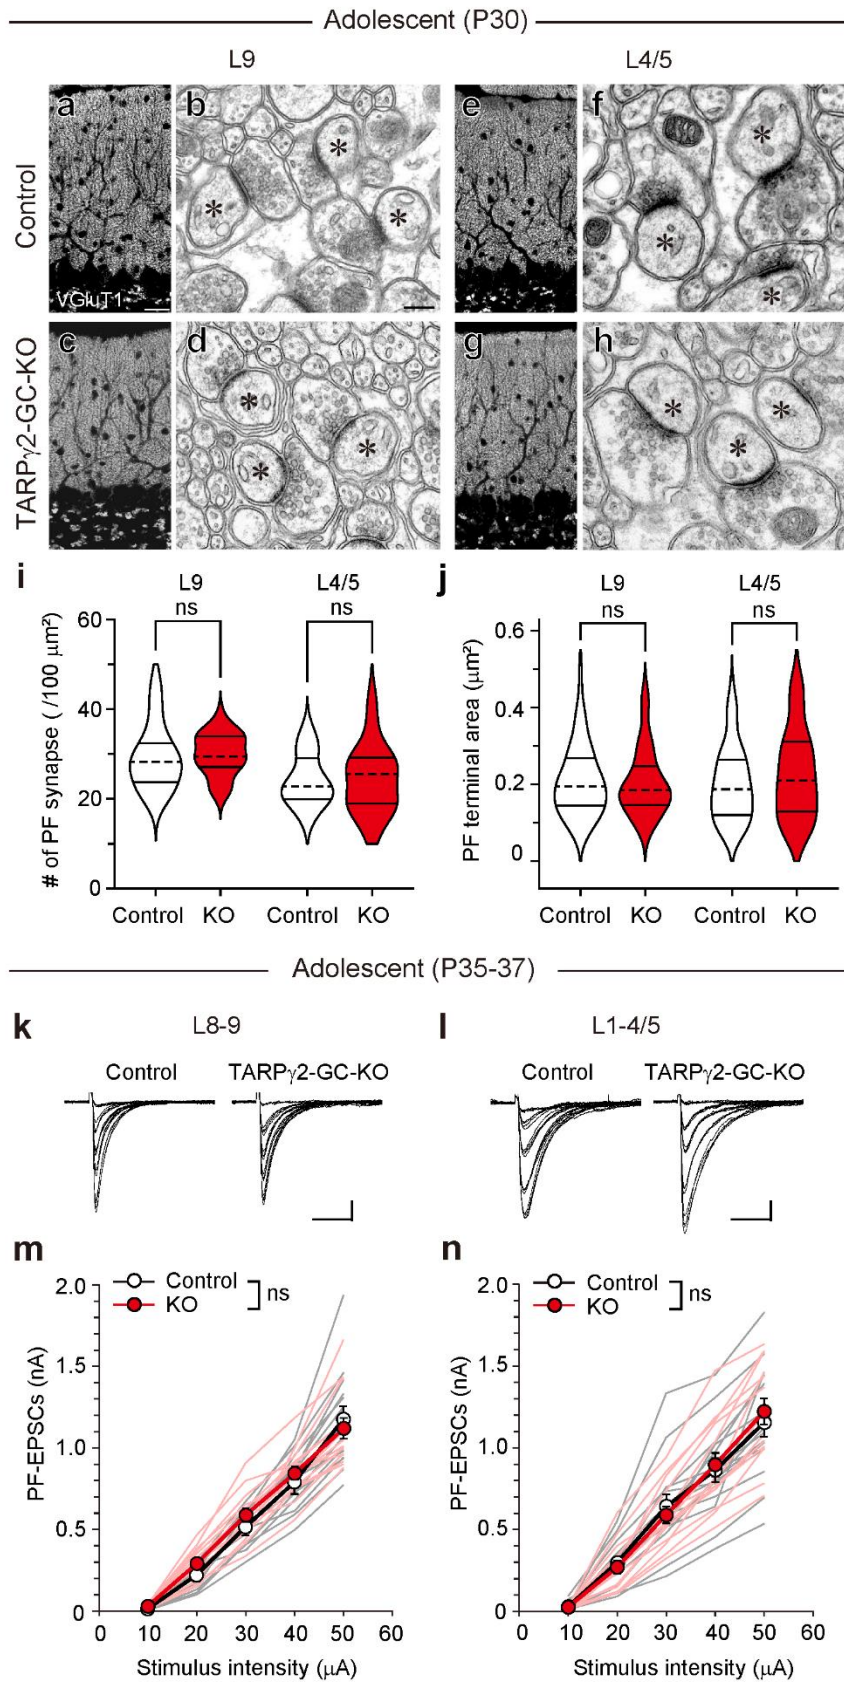

**Supplementary Figure 4. Quantitative morphological and electrophysiological analyses of PF-PC synapse in adolescent control and TARPy2-GC-KO mice**

**a-h** Light microscopic immunofluorescent images for the PF terminal marker VGluT1 (**a, c, e, g**) and electron microscopic images showing PF-PC synapses (**b, f, d, h**) in lobule 9 (**a-d**) and lobule 4/5 (**e-h**) from control (**a, b, e, f**) and TARPy2-GC-KO (**c, d, g, h**) mice at P30. Scale bars in **a** and **b** are 20  $\mu\text{m}$  and 200 nm, respectively. Asterisks in **b, f, d, h** indicate PC spines. The distribution and the punctate staining pattern of VGluT1 signals and the morphology of PF-PC synapses appear normal in TARPy2-GC-KO mice in both lobules 9 and 4/5.

**i, j** Summary violin plots for the density of PF-PC synapses (**i**) and the PF terminal area (**j**) in lobule 9 and lobule 4/5 from control (open plots) and TARPy2-GC-KO (filled plots) mice. The dashed line within each violin plot represents the median, while the solid lines at the top and bottom indicate the 75th and 25th percentiles, respectively.

**k-n** Sample traces of PF-EPSCs with stepwise increase of stimulus intensity (**k, l**) and summary graphs showing the stimulus-response relationship of PF-EPSCs (**m, n**) in lobule 9 (**k, m**) and lobule 4/5 (**l, n**) of control (white symbols with bold black line,  $n = 13$  for **m**,  $n = 15$  for **n**) and TARPy2-GC-KO (red symbols with red bold line,  $n = 14$  for **m**,  $n = 14$  for **n**) mice at P35 to P37. Data from individual cells are shown in faint lines. No difference was noted in the stimulus-response relationship between the two mouse strains in either lobule.  $P = 0.553$  for lobule 9 and  $P = 0.953$  for lobule 4/5. Two-way Repeated-Measures ANOVA. Data are mean  $\pm$  SEM.

## Supplementary Figure 5

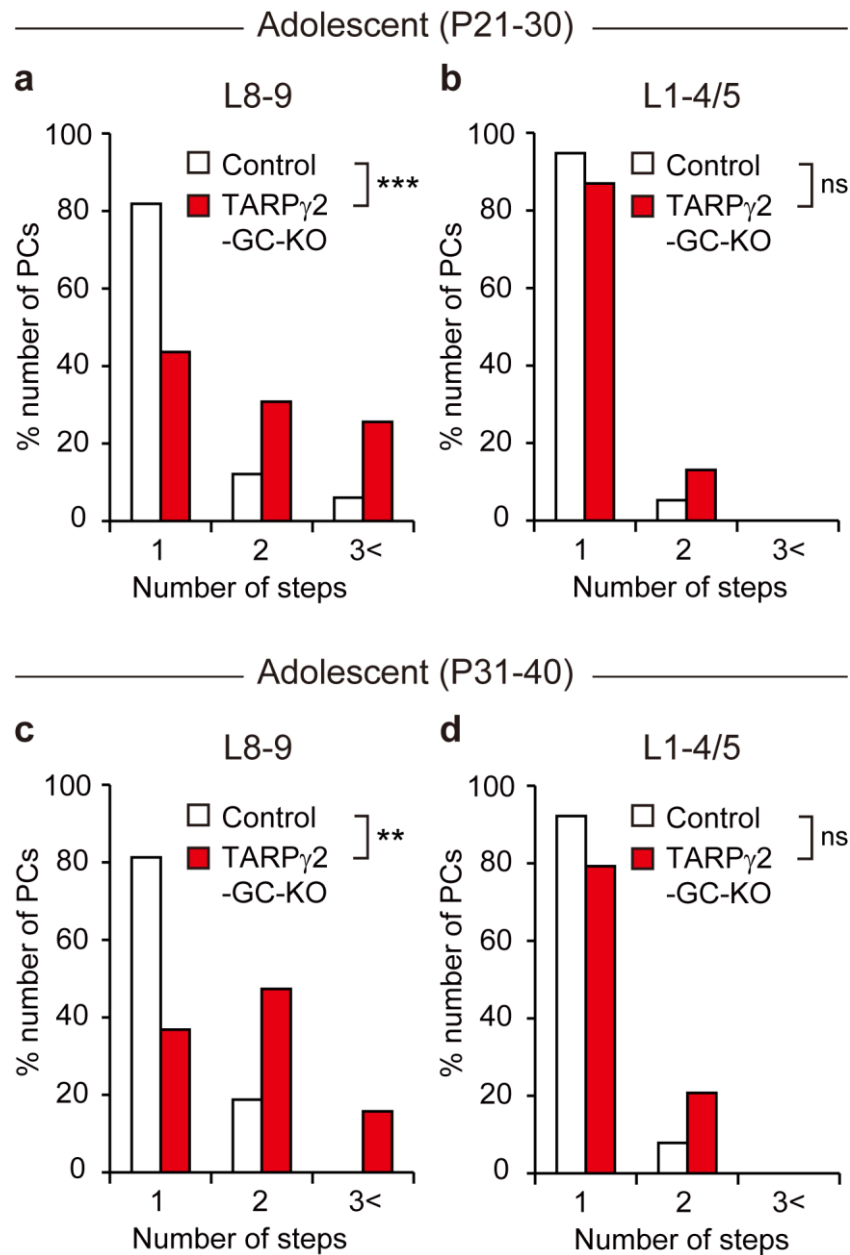

### Supplementary Figure 5. CF innervation of PCs from P21 to P30 and from P31 to P40

**a-d** Persistent multiple CF innervation of PCs in cerebellar lobules 8-9 of TARP $\gamma$ 2-GC-KO mice from P21 to P40. Frequency distribution histograms of PCs in terms of the number of discrete CF-EPSC steps during P21-P30 (**a, b**) and P31-P40 (**c, d**) in cerebellar lobules 8-9 (**a, c**) and 1-4/5 (**b, d**) from control (white columns) and TARP $\gamma$ 2-GC-KO (red columns) mice. \*\*  $P < 0.01$ , \*\*\* and  $P < 0.001$ , Mann-Whitney  $U$  test.



## Supplementary Figure 6

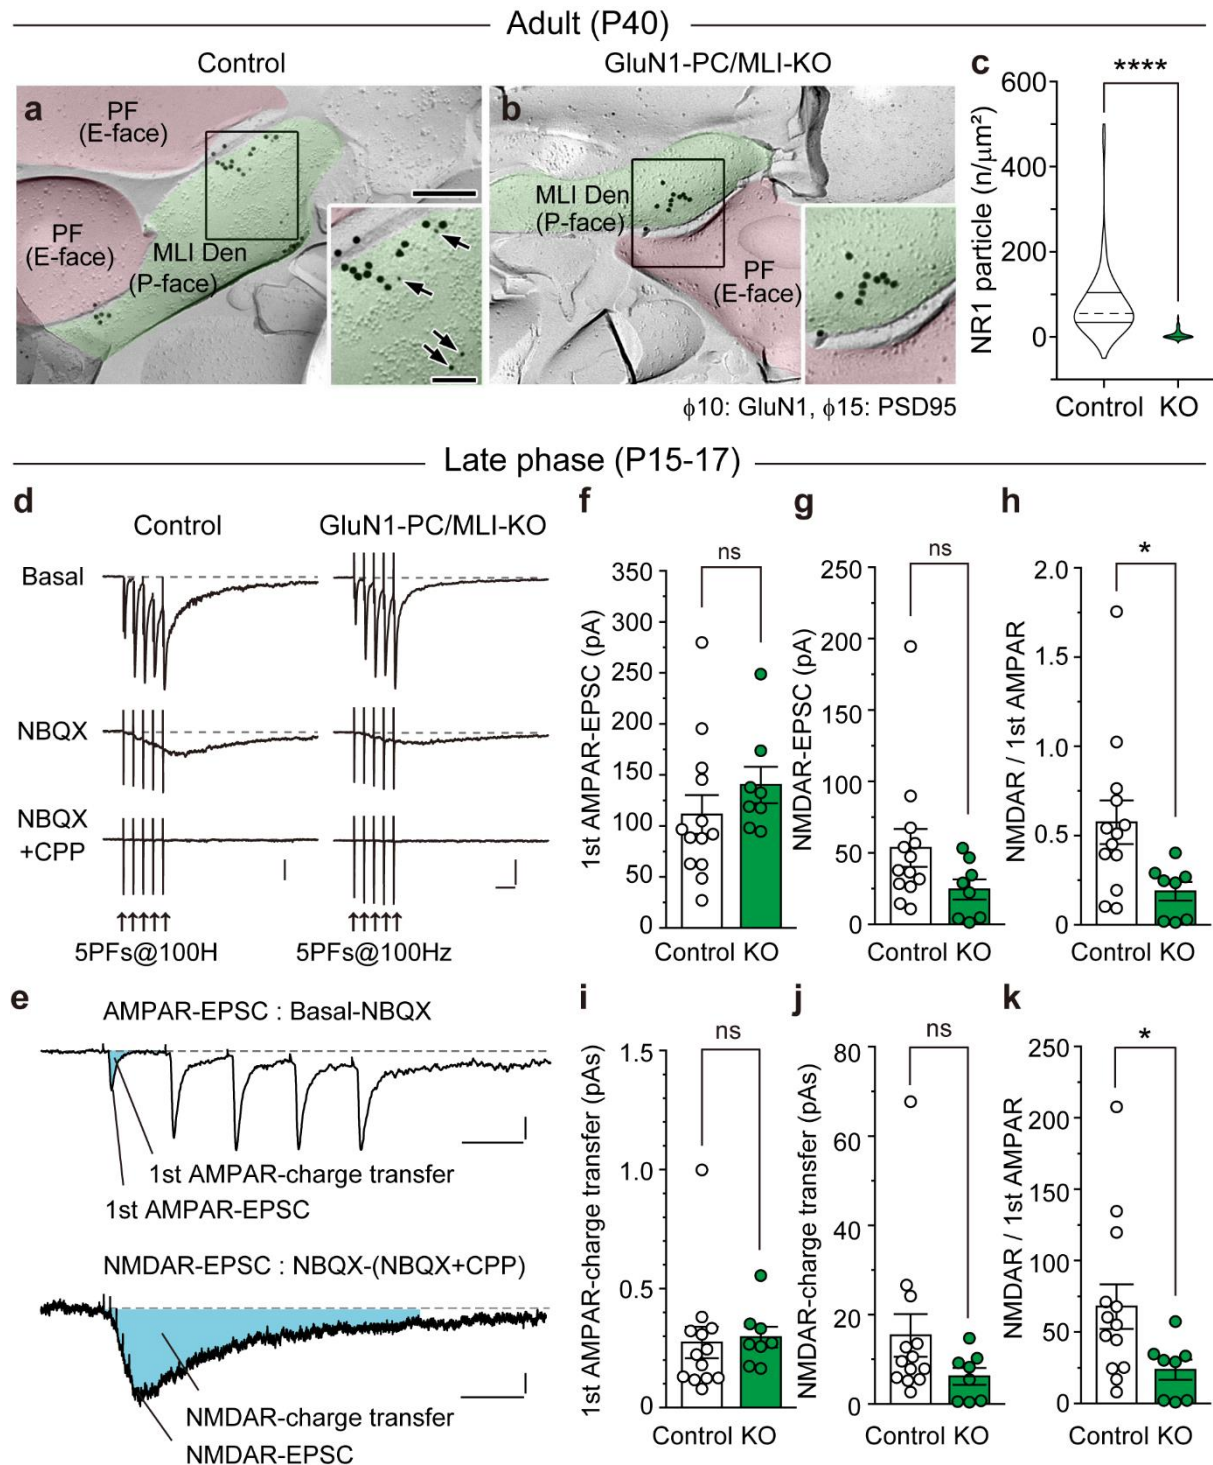

### Supplementary Figure 6. Reduction of PF-induced NMDAR responses in MLIs of GluN1-MLI/PC-KO mice

**a, b** SDS-digested freeze-fracture replica labeling of immunogold particles for GluN1 (10 nm particles) and PSD95 (15 nm particles) in a control (**a**) and a GluN1-MLI/PC-KO (**b**) mouse at P40. Scale bar: 200 nm for low magnification images, 100 nm for

high magnification images.

**c** Summary violin plots for the number of NR1 gold particles per  $\mu\text{m}^2$  of MLI dendrites in control (open plot) and GluN1-MLI/PC-KO (filled plot) mice. The dashed line within each violin plot represents the median, while the solid lines at the top and bottom indicate the 75th and 25th percentiles, respectively.

**d** Sample traces of EPSCs in MLIs elicited by high-frequency stimulation of PFs (5 pulses at 100 Hz) in a control (left panels) and a GluN1-MLI/PC-KO (right panels) mouse. Basal EPSCs were recorded at a holding potential of -70 mV in 0 mM  $\text{Mg}^{2+}$ - and 10  $\mu\text{M}$  glycine-containing bath solution to enhance NMDAR-mediated currents. NBQX (10  $\mu\text{M}$ ) and R-CPP (5  $\mu\text{M}$ ) were added sequentially to the bathing solution. Scale bars, 20 ms and 50 pA.

**e** Sample traces of EPSCs in MLIs elicited by high-frequency stimulation of PFs with higher time resolution than in **d** to illustrate how to measure the peak amplitude and charge transfer of the 1<sup>st</sup> AMPAR component and the NMDAR component. The AMPAR-mediated EPSC components were obtained by subtracting the EPSCs in the presence of 10  $\mu\text{M}$  NBQX from the basal EPSCs. The NMDAR-mediated EPSC components were obtained by subtracting EPSCs in the presence of 10  $\mu\text{M}$  NBQX and 5  $\mu\text{M}$  R-CPP from those with 10  $\mu\text{M}$  NBQX. The areas indicated with light blue exemplify how the charge transfer of the 1<sup>st</sup> AMPAR-mediated EPSC (measured for 10 ms after the 1<sup>st</sup> stimulus) and that of NMDAR-mediated EPSCs (measured for 500 ms after the 1<sup>st</sup> stimulus) were measured.

**f-h** Summary bar graphs showing the peak amplitude of the 1<sup>st</sup> AMPAR component (**f**), that of the NMDAR component (**g**), and the ratio of the peak NMDAR component over the 1<sup>st</sup> AMPAR component (**h**) of EPSCs in MLIs by high-frequency PF stimulation in control (white columns) and GluN1-MLI/PC-KO (green columns) mice. (**f**, Control:  $111 \pm 19.0$  pA,  $n = 13$ , 4 mice; GluN1-MLI/PC-KO:  $140 \pm 17.8$  pA,  $n = 8$ , 3 mice,  $P = 0.111$ . **g**, Control:  $53.5 \pm 13.2$  pA,  $n = 13$ , 4 mice; GluN1-MLI/PC-KO:  $24.4 \pm 7.07$  pA,  $n = 8$ , 3 mice,  $P = 0.060$ . **h**, Control:  $0.57 \pm 0.12$ ,  $n = 13$ , 4 mice; GluN1-MLI/PC-KO:  $0.19 \pm 0.05$ ,  $n = 8$ , 3 mice,  $*P = 0.01$ . Mann-Whitney  $U$  test). Data are mean  $\pm$  SEM.

**i-k** Summary bar graphs showing the charge transfer of the 1<sup>st</sup> AMPAR component (**i**), that of the NMDAR component (**j**), and the ratio of the charge transfer of the NMDAR component over that of the 1<sup>st</sup> AMPAR component (**k**) in control (open columns) and GluN1-MLI/PC-KO (filled columns) mice. (**i**, Control:  $0.27 \pm 0.07$  pAs,  $n = 13$ , 4 mice; GluN1-MLI/PC-KO:  $0.30 \pm 0.04$  pAs,  $n = 8$ , 3 mice,  $P = 0.277$ . **j**, Control:  $15.3 \pm 4.79$  pAs,  $n = 13$ , 4 mice; GluN1-MLI/PC-KO:  $6.16 \pm 1.88$  pAs,  $n = 8$ , 3 mice,  $P = 0.128$ . **k**, Control:  $67.9 \pm 15.6$ ,  $n = 13$ , 4 mice; GluN1-MLI/PC-KO:  $23.7 \pm 7.15$ ,  $n = 8$ , 3 mice,  $*P = 0.036$ . Mann-Whitney  $U$  test). Data are mean  $\pm$  SEM.

## Supplementary Figure 7

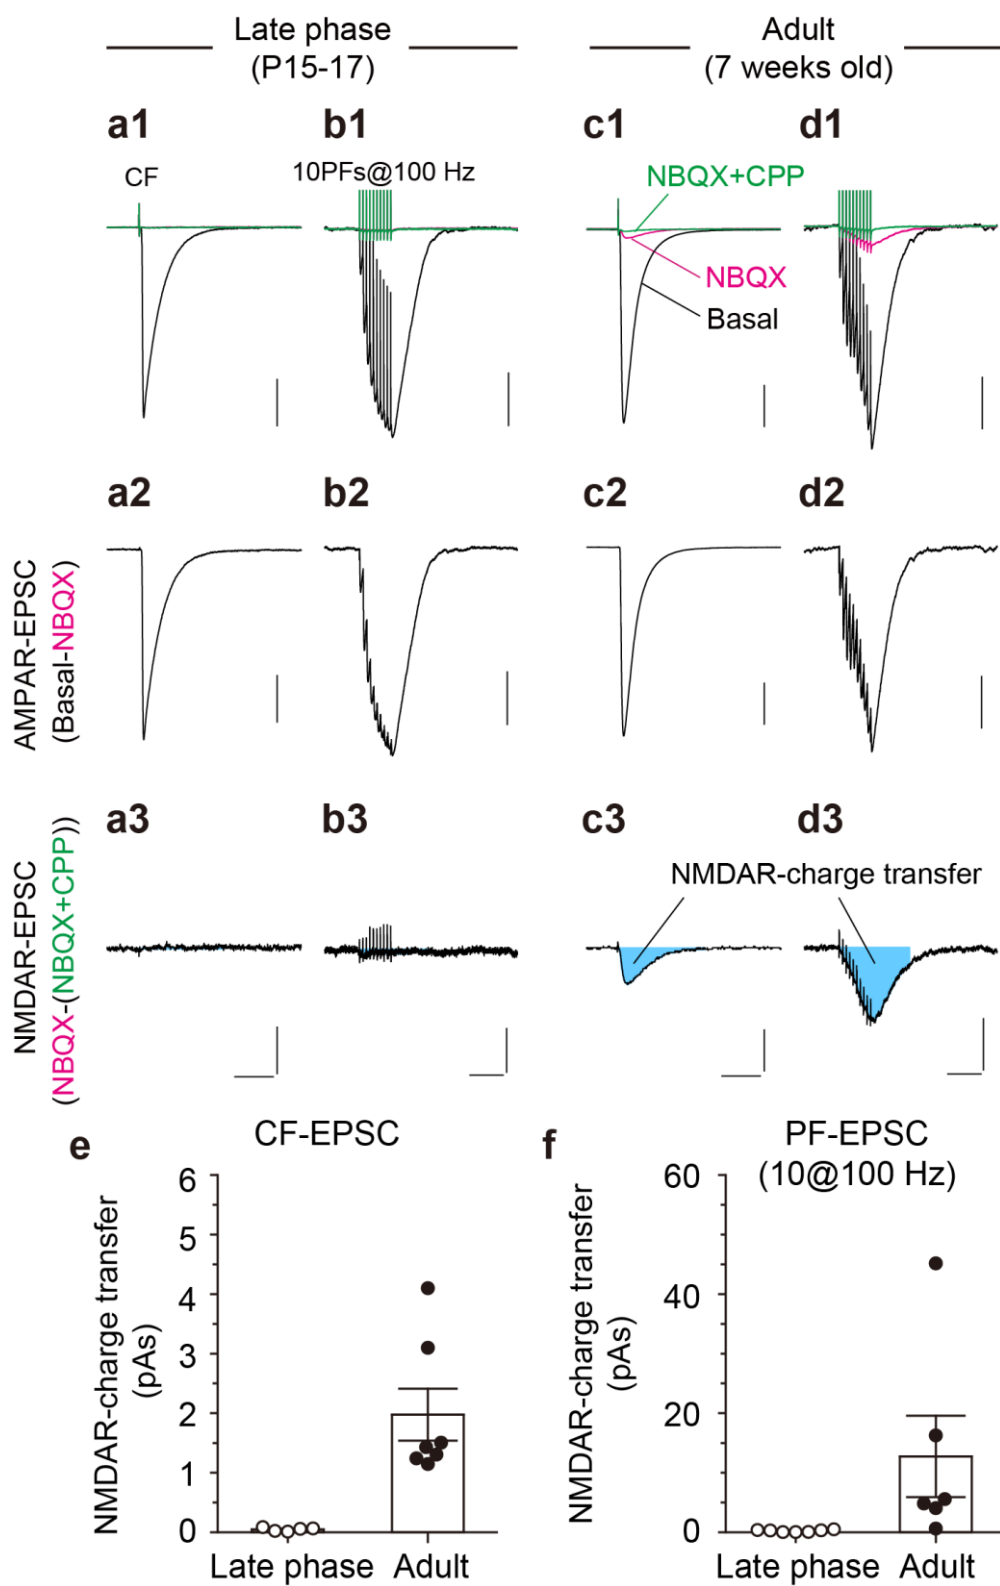

### Supplementary Figure 7. Deficient NMDAR-mediated component in CF-EPSCs and PF-EPSCs of PCs in P17 mice

**a-d** Sample traces of CF-EPSCs (**a1-3**, **c1-3**) and PF-EPSCs in response to high-frequency PF stimulation of 10 pulses at 100 Hz (**b1-3**, **d1-3**) recorded in a PC of a control mouse at P16 (**a1-3**, **b1-3**) and 7 weeks of age (**c1-3**, **d1-3**). Holding potential, -70 mV. Scale bars for CF-EPSCs, 20 ms (**a1**, **a2**, **c1**, **c2**) and 200 pA (**a3**, **c3**). Scale bars for PF-EPSCs, 100 ms, 300 pA (**b1**, **b2**), 50 pA (**b3**), 500 pA (**d1**, **d2**) and 100 pA (**d3**). The basal EPSCs were recorded in a bathing solution containing no  $Mg^{2+}$  and 10  $\mu M$  glycine to maximize NMDAR activation. In addition, we included in the bathing solution 100  $\mu M$  CPCCOEt (Tocris) to block mGlu1, picrotoxin (100  $\mu M$ ) to block GABA<sub>A</sub>Rs, and 0.3  $\mu M$  NBQX to partially block AMPARs and improve the accuracy of voltage clamp for recording CF-EPSCs at the holding potential of -70 mV. After recording basal CF-EPSCs or PF-EPSCs, NBQX (10  $\mu M$ ) and R-CPP (5  $\mu M$ ) were added sequentially to the bathing solution. The AMPAR-mediated EPSC components (AMPA\_EPSC, **a2**, **b2**, **c2**, **d2**) were obtained by subtracting the EPSCs in the presence of 5  $\mu M$  NBQX from the basal EPSCs. The NMDAR-mediated EPSC components (NMDAR\_EPSC, **a3**, **b3**, **c3**, **d3**) were obtained by subtracting EPSCs in the presence of 10  $\mu M$  NBQX and 5  $\mu M$  R-CPP from those with 10  $\mu M$  NBQX. The areas indicated with light blue in **c3** and **d3** exemplify how charge transfers of NMDAR-mediated components were measured in **e** and **f**.

**e, f**, Summary bar graphs showing the NMDAR-mediated charge transfer of CF-EPSCs (**e**, measured for 50 ms after the CF stimulus. Late phase:  $0.05 \pm 0.01$  pAs,  $n = 5$ , 2 mice; Adult:  $1.97 \pm 0.44$  pAs,  $n = 7$ , 2 mice) and PF-EPSCs (**f**, measured for 200 ms after the 1<sup>st</sup> PF stimulus. Late phase:  $0.25 \pm 0.07$  pAs,  $n = 6$ , 2 mice; Adult:  $12.7 \pm 6.83$  pAs,  $n = 6$ , 2 mice). Data are mean  $\pm$  SEM.
