# Supplementary material for: Direct and indirect pathways for heterosynaptic interaction underlying developmental synapse elimination in the mouse cerebellum
Source: PubMed Central journal article supplement (PMC11222442; doi:10.1038/s42003-024-06447-4), 2024-07-03
Supplement: 42003_2024_6447_MOESM3_ESM.pdf [file 42003_2024_6447_MOESM3_ESM.pdf]

## Description of Additional Supplementary Files

**File name:** Supplementary Data 1

**Description:** The source data behind the graphs and charts in the paper
